# Supplementary material for: Strategies for Implementing an Electronic Patient-Reported Outcomes-Based Symptom Management Program Across Six Cancer Centers
Source: Research Square preprint supplement (doi:10.21203/rs.3.rs-3879836/v1), 2024-01-24
Supplement: Supplementary file 1 [file 4f633865b8eace293d701a7c.docx]

**Supplemental Tables**

Table of Contents

[**Supplemental Table 1. Example Items Collected on the REDCap Implementation Strategy Tracker** 2](#_Toc145494592)

[**Supplemental Table 2. Description of Foundational Strategies**  3](#_Toc145494593)

[**Supplemental Table 3. Description of Universal (High Impact) Strategies** 10](#_Toc145494594)

[**Supplemental Table 4. Summary of Thematic Classifications for Universal Strategies** 17](#_Toc145494595)

[**Supplemental Table 5. Description of Adaptive Strategies** 21](#_Toc145494596)

[**Supplemental Table 6. Description of Inactive Strategies** 27](#_Toc145494597)

# **Supplemental Table 1. Example Items Collected on the REDCap Implementation Strategy Tracker**

| **Requested Information** | **Response Options** |
| --- | --- |
| **Strategy Summary** | Open text |
| **ERIC Classification** | Select one of the nine ERIC strategy classifications |
| **ERIC Sub-Classification** | Select appropriate ERIC sub-classification |
| **Primary Barriers Addressed** | Select one of the five CFIR barriers |
| **Specific Barriers** | Select appropriate CFIR sub-classification |
| **Primary Implementation Outcome** | Increase acceptability, adoption, appropriateness, cost, feasibility, fidelity, reach, or sustainability |
| **Active Status** | Active or Inactive |
| **Strategy Start and End Date** | Date |
| **Was the strategy prospective (planned)?** | Yes or No |
| **When did this implementation strategy start?** | Before Go-Live, During Go-Live, After Go-Live |
| **How frequently did you utilize the strategy?** | One time, daily, once weekly, twice weekly, once monthly, twice monthly, quarterly, annually |
| **How long does it take to do the strategy?** | Number of minutes |
| **By whom was the strategy used?** | Physicians, nurses, other clinicians, quality improvement leaders, information technology (IT), patient navigators/case managers, study research staff, or other:____ |
| **Why did this strategy stop?** | N/A – strategy is still in use, planned stoppage, wasn’t working ineffective, clinicians or leadership didn’t like it, too time intensive (infeasible), required too many resources |

# **Supplemental Table 2. Description of Foundational Strategies**

| **Brief Strategy Description** | **ERIC Classification** | **CFIR Barrier Addressed** | **Implementation Frequency** | **Average Duration** | **Strategy Implementer** | **Implementation Timing** |
| --- | --- | --- | --- | --- | --- | --- |
| **Monthly consortium-wide meetings** | Use evaluative and iterative strategies | Barriers in the outer setting, inner setting, delivery setting, individuals implementing and supporting the intervention | Once monthly | 60 min | Study Research Staff | Before go-live |
| **Collection of key performance indicators** | Use evaluative and iterative strategies | Barriers related to process in the delivery setting | Once weekly | 60 min | Study Research Staff | During go-live |
| **Overall wellbeing alerting turned off, physical function alerting threshold changed** | Use evaluative and iterative strategies | Barriers related to characteristics of the intervention | One time | 30 min | Information Technology (IT) | After go-live |
| **Questionnaire lookback period changed from 7 days to 24 hours** | Use evaluative and iterative strategies | Barriers related to characteristics of the intervention | One time | 60 min | Information Technology (IT) | After go-live |
| **Consortium-wide newsletter distributed to stakeholders** | Develop Stakeholder Interrelationships | Barriers related to characteristics of the individuals implementing and supporting the intervention | Once monthly | 60 min | Study research staff | During go-live |
| **Creation of the consortium website and regular updates** | Engaging consumers | Barriers related to process in the delivery setting | Quarterly | 120 min | Study research staff | Before go-live |
| **Creation of new emojis for pictogram questions** | Use evaluative and iterative strategies | Barriers related to characteristics of the intervention | One time | n/a | Study research staff | After go-live |
| **Pre go-live clicker questions and informal focus groups** | Use evaluative and iterative strategies | Barriers related to characteristics of the individuals implementing and supporting the intervention | One time | 15 min | Study research staff | Before go-live |
| **Post go-live stakeholder surveys and interviews** | Use evaluative and iterative strategies | Barriers related to characteristics of the individuals implementing and supporting the intervention | One time | 15 min | Study research staff | After go-live |
| **Creation of Epic turbocharger package and build guide for sites** | Use evaluative and iterative strategies | Barriers related to characteristics of the intervention | One time | n/a | Information Technology (IT) | After go-live |
| **Technical lead calls/office hours with Epic** | Provide interactive assistance | Barriers related to process in the delivery setting | Once weekly | 60 min | Information Technology (IT) | Before go-live |
| **Created 14 sqls for sites to extract eSyM data from the EHR** | Adapt and tailor to the context | Barriers related to process in the delivery setting | Quarterly | 120 min | Information Technology (IT) | After go-live |
| **Site visits prior to go-live for medical oncology and surgery clinics** | Develop stakeholder interrelationships | Barriers in the inner setting | One time | 8 hrs | Study research staff | Before go-live |
| **Created flyers, pamphlets, tip sheets, videos and templates for consortium sites to use** | Train and educate stakeholders | Barriers related to process in the delivery setting | One time | 40 hrs | Study research staff | Before go-live |
| **Monthly calls with project managers and 1-on-1 meetings as needed to provide assistance** | Train and educate stakeholders | Barriers in the outer setting | Monthly | 60 min | Study research staff | Before go-live |
| **Pilot testing of eSyM questionnaire prior to go-live** | Engaging consumers | Barriers related to characteristics of the intervention | Select patient encounters | 15 min | Study research staff | Before go-live |
| **Creation of SIMPRO consortium** | Develop stakeholder interrelationships | Barriers in the outer setting | One time | n/a | Study research staff | Before go-live |
| **Data use agreements and IRB approvals obtained for each of the sites** | Develop stakeholder interrelationships | Barriers in the outer setting | Quarterly | 20 hrs | Study research staff | Before go-live |
| **Identification of tech leads, project managers, and data analysts at each site** | Develop stakeholder interrelationships | Barriers related to characteristics of the individuals implementing and supporting the intervention | One time | n/a | Study research staff | Before go-live |
| **Centralized consortium data experts identified via Epic** | Adapt and tailor to the context | Barriers in the outer setting | One time | n/a | Information technology (IT) | Before go-live |
| **Tailor education, outreach, and workplan based on needs and staffing at site** | Adapt and tailor to the context | Barriers in the inner setting | Ad hoc | n/a – ongoing process | Study research staff | Before go-live |
| **Shared consortium resources with sites** | Train and educate stakeholders | Barriers related to process in the delivery setting | One time | 15 min | Study research staff | Before go-live |
| **XGM presentations and Epic Share Point Article** | Develop stakeholder interrelationships | Barriers related to process in the delivery setting | One time | n/a | Study research staff | After go-live |
| **Epic eSyM developers training assigned Epic- based site technical support teams to support and sustain eSyM after go-live** | Provide interactive assistance | Barriers in the outer setting | One time | 60 min | Information technology (IT) | During go-live |
| **Hiring clinical research coordinators to assist with outreach** | Change infrastructure | Barriers related to process in the delivery setting | One time | n/a | Study research staff | Before go-live |
| **Sharing of KPIs with program champions** | Support clinicians | Barriers related to characteristics of the intervention | Once monthly | 15 min | Study research staff | After go-live |
| **Evolution of data monitoring; moved away from dashboard metrics to SQLs/KPIs** | Adapt and tailor to the context | Barriers related to characteristics of the intervention | One time | n/a | Study research staff | After go-live |
| **Substantial change to program homepage in the EHR portal** | Change infrastructure | Barriers related to characteristics of the intervention | One time | n/a | Information technology (IT) | After go-live |
| **Epic eSyM developers training local SIMPRO site technical analysts to deploy and maintain local eSyM builds before go-live** | Provide interactive assistance | Barriers related to characteristics of the individuals implementing and supporting the intervention | One time | 8 hrs | Information technology (IT) | Before go-live |
| **Administering and collecting responder and non-responder surveys from patients to understand barriers to eSyM use** | Use evaluative and iterative strategies | Barriers related to characteristics of the individuals implementing and supporting the intervention | Select patient encounters | 15 min | Study research staff | After go-live |
| **Deciding which data metrics to include in KPI reports across all sites** | Use evaluative and iterative strategies | Barriers related to process in the delivery setting | One time | n/a | Study research staff | Before go-live |
| **Began alerting patients to contact their clinicians in response to severe symptom reports** | Engage consumers | Barriers related to process in the delivery setting | Select patient encounters | 1 min | Other: patients | During go-live |
| **Alerting to clinicians about patients with severe symptoms** | Support clinicians | Barriers related to process in the delivery setting | Select patient encounters | 1 min | Physicians | During go-live |
| **eSyM reminders added to discharge paperwork** | Engage consumers | Barriers related to process in the delivery setting | Every patient encounter | 1 min | Information Technology (IT) | After go-live |
| **IMPACT funding to support project** | Utilize financial strategies | Barriers in the outer setting | One time | n/a | Study research staff | Before go-live |

# **Supplemental Table 3. Description of Universal (High Impact) Strategies**

| **Brief Strategy Description** | **ERIC Classification** | **CFIR Barrier Addressed** | **Implementation Frequency** | **Average Duration** | **Strategy Implementer** | **Implementation Timing** |
| --- | --- | --- | --- | --- | --- | --- |
| **Inclusion of eSyM icon on the DAR/schedule view** | Adapt and tailor to the context: promote adaptability of the EBP | Delivery setting | One time | 3 hrs | Nurses, clinicians, physicians | After Go-Live |
| **Check-ins and reengagement meetings w/ nurses** | Train and educate stakeholders: provide ongoing consultation | Delivery setting | Once monthly | 45 min | Study research staff | During Go-Live |
| **Ensuring patients have access to their portal account** | Engage consumers: prepare patients/consumers to be active participants / intervene w/ patients/consumers to enhance uptake and adherence | Delivery setting | Select patient encounters | 10 min | Study research staff/IT | After Go-Live |
| **Patient outreach via email or portal message** | Engage consumers: intervene w/ patients/consumers to enhance uptake and adherence | Delivery setting | Select patient encounters | 10 min | Study research staff | After Go-Live |
| **Telephone outreach to patients** | Engage consumers: intervene w/ patients/consumes to enhance uptake and adherence | Delivery setting | Select patient encounters | 10 min/pt | Study research staff | During/After Go-Live |
| **In-person patient approaches** | Engage consumers: prepare patients/consumers to be active participants | Delivery setting, inner setting | Daily | 15 min/pt | Study research staff | After Go-Live |
| **eSyM flyers/brochures given to patients** | Engage consumers: prepare patients/consumers to be active participants | Delivery setting | Every patient encounter | 5 min | Study research staff/nurses | After Go-Live |
| **Sending clinicians opportunity reports/reminding them to discuss eSyM with patients** | Support clinicians: remind clinicians/facilitate relay of clinical data to providers | Delivery setting, inner setting | Once monthly | ~45 min | Study research staff | After Go-Live |
| **Updating/rebranding**  **marketing materials** | Engage consumers: use mass media | Delivery setting | One time | 1hr 15 min | Study research staff | After Go-Live |
| **Sharing KPIs w/ eSyM champions** | Support clinicians: facilitate relay of clinical data to providers | Delivery setting | Once monthly | 1hr | Study research staff/physicians | After Go-Live |
| **iPad deployment** | Change infrastructure: change physical infrastructure | Delivery setting | Select patient encounters | 15 min | Study research staff | After Go-Live |
| **Hiring new staff** | Change infrastructure: other – hiring staff | Delivery setting | One time | n/a | Study research staff | Before/After Go-Live |
| **Automated KPIs** | Use Evaluative and Iterative Strategies: Develop and implement tools for quality monitoring | Delivery setting | Once weekly | 5 min | IT | After Go-Live |
| **Manual KPIs** | Use Evaluative and Iterative Strategies: Develop and implement tools for quality monitoring | Delivery setting | Once weekly | 1hr | Study research staff | During Go-Live |
| **Collecting informal patient feedback** | Use evaluative and iterative strategies: obtain and use patient/consumer and family feedback | Delivery setting | Select patient encounters | 10 min | Physicians, study research staff | After Go-Live |
| **Regular team meetings** | Use Evaluative and iterative strategies: Purposefully reexamine the implementation | Delivery setting | Once monthly | 1hr | Study research staff | Before Go-Live |
| **Pre go-live site meetings** | Use evaluative and iterative strategies: conduct local needs assessment | Characteristics of individuals implementing and supporting the intervention | One time | 1hr 30 mins | Study research staff | Before Go-Live |
| **Extension of eSyM to other clinics/patients** | Use evaluative and iterative strategies: stage implementation scale up | Inner setting | Select patient encounters | 5 hrs | Physicians/ study research staff | After Go-Live |
| **Validating reports and KPI data** | Use evaluative and iterative strategies audit and provide feedback | Characteristics of the intervention | One time | 5 min | Study research staff | Before Go-Live |
| **Calls with technical teams regarding program build and reports** | Provide interactive assistance: facilitation | Inner setting | Once monthly | 45 min | IT, study research staff | Before/After Go-Live |
| **Identifying eSyM champions** | Develop stakeholder interrelationships: identify and prepare champions | Characteristics of the individuals implementing and supporting the intervention | One time | 3 hrs | Study research staff, physicians | Before Go-Live |
| **Regular meetings with pilot sites** | Develop stakeholder interrelationships: identify early adopters | Inner setting, characteristics of the individuals implementing and supporting the intervention | One time | n/a | Study research staff | Before Go-Live |
| **Attending other meetings within the network to promote eSyM** | Develop stakeholder interrelationships: capture and share local knowledge | Characteristics of the individuals implementing and supporting the intervention | One time | 35 min | Study research staff | Before Go-Live |
| **Engaging with network leadership** | Develop Stakeholder interrelationships: involve executive boards | Inner setting | One time | 30 min | Quality improvement leaders, study research staff | After Go-Live |
| **Clinical staff training** | Train and educate stakeholders: use train-the-trainer strategies | Characteristics of the individuals implementing and supporting the intervention | One time | 45 min | Study research staff | After Go-Live |
| **On-site and online eSyM education** | Train and educate stakeholders; conduct educational meetings | Characteristics of the individuals implementing and supporting the intervention | One time | 90 min | Study research staff | Before Go-Live |
| **eSyM refreshers and retraining** | Train and educate stakeholders: conduct ongoing training | Characteristics of the individuals implementing and supporting the intervention | One time | 40 min | Study Research staff | After Go-Live |
| **Distribution of educational resources to clinicians** | Train and educate stakeholders: distribute educational materials | Delivery setting, characteristics of intervention, characteristics of individuals implementing and supporting the intervention | One time | 10 min | Study research staff | Before Go-Live |
| **Visiting other sites** | Train and educate stakeholders: conduct educational outreach visits | Delivery setting, inner setting, characteristics of the individuals implementing and supporting the intervention | One time | 2hrs 45 min | Study research staff | Before Go-Live |

# **Supplemental Table 4. Summary of Thematic Classifications for Universal Strategies**

| **Brief Strategy Description** | **ERIC Classification** | **CFIR Barrier/s** | **Challenging v. Straightforward** | **Technical v. Human** | **Proactive v. Reactive** |
| --- | --- | --- | --- | --- | --- |
| **Automating key performance indicator reports** | Use Evaluative & Iterative Strategies | Delivery Setting | Challenging | Technical | Reactive |
| **Manual collection of key performance indicators for quality monitoring at regular intervals** | Use Evaluative & Iterative Strategies | Delivery Setting | Challenging | Manual | Proactive |
| **Gathering informal patient feedback throughout program rollout** | Use Evaluative & Iterative Strategies | Delivery Setting | Straightforward | Manual | Reactive |
| **Monthly site team operations meetings** | Use Evaluative & Iterative Strategies | Delivery Setting | Straightforward | Manual | Proactive |
| **Preparatory meetings before program deployments** | Use Evaluative & Iterative Strategies | Characteristics of the individuals implementing and supporting the intervention | Straightforward | Manual | Proactive |
| **Expanding eSyM to additional clinics and patient populations** | Use Evaluative & Iterative Strategies | Inner Setting | Challenging | Technical | Reactive |
| **Auditing the intervention at regular intervals** | Use Evaluative & Iterative Strategies | Characteristics of the Intervention | Challenging | Manual | Proactive |
| **Ad hoc technical team meetings with Epic support** | Provide Interactive Assistance | Inner Setting | Straightforward | Manual | Reactive |
| **Addition of eSyM-program icon to the Epic EHR department appointment report** | Adapt and Tailor to the Context | Delivery Setting | Straightforward | Technical | Reactive |
| **Identify eSyM-specific clinic champions** | Develop Stakeholder Interrelationships | Characteristics of the individuals implementing and supporting the intervention | Straightforward | Manual | Proactive |
| **Building relationships with satellite clinics** | Develop Stakeholder Interrelationships | Inner Setting | Straightforward | Manual | Proactive |
| **Attending clinic-specific meetings to promote eSyM (e.g. division meetings, nurse huddles)** | Develop Stakeholder Interrelationships | Characteristics of the individuals implementing and supporting the intervention | Straightforward | Manual | Proactive |
| **Presenting eSyM progress to institutional leadership (e.g. executive boards)** | Develop Stakeholder Interrelationships | Inner Setting | Straightforward | Manual | Proactive |
| **Training eSyM champions to serve as superusers for their clinics** | Train & Educate Stakeholders | Characteristics of the individuals implementing and supporting the intervention | Straightforward | Manual | Proactive |
| **Conducting educational sessions with select clinic groups** | Train & Educate Stakeholders | Characteristics of the individuals implementing and supporting the intervention | Straightforward | Manual | Proactive |
| **Conducting refresher educational sessions with select clinic groups** | Train & Educate Stakeholders | Characteristics of the individuals implementing and supporting the intervention | Straightforward | Manual | Reactive |
| **Ad hoc consultations with end users as questions arise** | Train & Educate Stakeholders | Characteristics of the individuals implementing and supporting the intervention | Straightforward | Manual | Reactive |
| **Distribution of eSyM educational materials (e.g. FAQ pages, setup instructions, flyers)** | Train & Educate Stakeholders | Characteristics of the intervention, delivery setting | Straightforward | Manual | Proactive |
| **Site visits** | Train & Educate Stakeholders | Inner Setting, Delivery Setting, Characteristics of the individuals implanting and supporting the intervention | Straightforward | Manual | Proactive |
| **Help patients sign up for MyChart** | Engage Consumers | Delivery Setting | Straightforward | Manual | Proactive |
| **Patient outreach communications (e.g. reminder communications,)** | Engage Consumers | Delivery Setting | Challenging | Manual | Reactive |
| **Direct outreach to patients (e.g. phone calls, portal messages)** | Engage Consumers | Delivery Setting | Challenging | Manual | Proactive |
| **In-person patient outreach (e.g. during hospitalizations or infusions)** | Engage Consumers | Delivery Setting, Inner Setting | Challenging | Manual | Proactive |
| **Distributing program flyers to patients** | Engage Consumers | Delivery Setting | Straightforward | Manual | Proactive |
| **Refresh of marketing materials** | Engaging Consumers | Delivery Setting | Straightforward | Manual | Reactive |
| **Remind clinicians about eSyM patients** | Support Clinicians | Delivery Setting, Characteristics of the individuals implanting and supporting the intervention | Challenging | Manual | Reactive |
| **Share key performance indicators with staff** | Support Clinicians | Outer Setting, Delivery Setting | Straightforward | Manual | Proactive |
| **Utilizing iPads to collect eSyM response in clinic** | Change Infrastructure | Delivery Setting | Straightforward | Technical | Reactive |
| **Hiring new staff to support program rollout** | Change Infrastructure | Delivery Setting | Challenging | Manual | Reactive |

# **Supplemental Table 5. Description of Adaptive Strategies**

| **Brief Strategy Description** | **Site** | **ERIC Classification** | **CFIR Barrier Addressed** | **Implementation Frequency** | **Average Duration** | **Strategy Implementer** | **Implementation Timing** |
| --- | --- | --- | --- | --- | --- | --- | --- |
| **Drafted eSyM workflow overview (used to train new hires)** | Baptist | Use evaluative and iterative strategies | Barriers in the inner setting | One time | 2 hrs | Study research staff | After go-live |
| **Changed scripting to educational approach and called patients once monthly rather than every 2 weeks, soon reverted back to regular workflow** | Baptist | Use evaluative and iterative strategies | Barriers related to process in the delivery setting | Select patient encounters | 10 min | Study research staff | After go-live |
| **Moderate symptom pilot in GYN clinic, nursing staff called patients with moderate symptoms** | DFCI | Use evaluative and iterative strategies | Barriers related to characteristics of the individuals implementing and supporting the intervention | Select patient encounters | 30-40 minutes | Nurses | After go-live |
| **Focused on supporting local, more populated clinics first and then focused on supporting smaller community clinics** | Maine | Use evaluative and iterative strategies | Barriers in the inner setting | One time | n/a | Study research staff | After go-live |
| **Preparatory meetings with Brigham thoracic teams, shifted focus to Mass General thoracic teams** | DFCI | Use evaluative and iterative strategies | Barriers in the inner setting | One time | n/a | Study research staff | Before go-live |
| **Project manager shadowed eSyM processes at clinic site to identify areas of opportunity** | Baptist | Use evaluative and iterative strategies | Barriers related to process in the delivery setting | One time | 60 min | Study research staff | After go-live |
| **Focus on direct communication/interaction with current MDs and surgery teams of stable staff** | Lifespan | Use evaluative and iterative strategies | Barriers in the inner settting | One time | n/a | Study research staff | After go-live |
| **Identification of target site to focus on that has minimum patient utilization** | Baptist | Use evaluative and iterative strategies | Barriers related to characteristics of the individuals implementing and supporting the intervention | Once monthly | 60 min | Study research staff | After go-live |
| **Maintain log of patient concerns and technical issues** | Dartmouth | Use evaluative and iterative strategies | Barriers related to process in the delivery setting | Select patient encounters | 10 min | Study research staff | After go-live |
| **Nurses join weekly meetings to provide feedback and updates** | Maine | Use evaluative and iterative strategies | Barriers related to process in the delivery setting | Once weekly | 30 min | Other clinicians | After go-live |
| **eSyM team addresses HelpDesk tickets and troubleshoots solutions** | Maine | Provide interactive assistance | Barriers related to characteristics of the intervention | Once weekly | 20 min | Study research staff | After go-live |
| **Moved full-text responses to a more easily accessible location in Epic** | WVU | Adapt and tailor to the context | Barriers related to characteristics of the intervention | One time | 30 min | Information technology (IT) | After go-live |
| **Updated clinician alerting to include providers** | WVU | Adapt and tailor to the context | Barriers related to characteristics of the intervention | One time | 60 min | Information technology (IT) | After go-live |
| **SmartPhrases created for symptom tip sheets so nursing teams could more easily disseminate** | Lifespan | Adapt and tailor to the context | Barriers related to characteristics of the intervention | Select patient encounters | 2 min | Nurses | After go-live |
| **Made SmartPhrase to include eSyM patient brochure in AVS** | Lifespan | Adapt and tailor to the context | Barriers related to characteristics of the intervention | Select patient encounters | 2 min | Study research staff | After go-live |
| **Regular meetings with Epic and technical support to refine program build** | Lifespan | Adapt and tailor to the context | Barriers in the inner setting | Once weekly | 60 min | Study research staff | Before go-live |
| **Adding bioinformatics group to regular team meetings to assist with data collection, cleaning, and sharing** | Lifespan | Adapt and tailor to the context | Barriers related to process in the delivery setting | Once monthly | 60 min | Study research staff | After go-live |
| **Adding procedure code to registry snapshot report, creating eSyM Snapshot for medical oncology patients** | Dartmouth | Adapt and tailor to the context | Barriers related to characteristics of the intervention | One time | 60 min | Information technology (IT) | After go-live |
| **Marketing team developed feature on eSyM for the annual report** | Maine | Develop stakeholder interrelationships | Barriers related to characteristics of the individuals implementing and supporting the intervention | One time | 60 min | Other | After go-live |
| **Emails to key stakeholders outlining program updates and programs** | Dartmouth | Develop stakeholder interrelationships | Barriers related to process in the delivery setting | Once monthly | 30 min | Study research staff | After go-live |
| **Thoracic surgery nurse follow up on all patient responses and got input from surgeons** | Dartmouth | Develop stakeholder interrelationships | Barriers related to characteristics of the individuals implementing and supporting the intervention | Select patient encounters | 60 min | Nurses | During go-live |
| **1-2 nurses familiar with the program since the start lead clinical teams** | WVU | Develop stakeholder interrelationships | Barriers related to characteristics of the individuals implementing and supporting the intervention | Select patient encounters | 60 min | Nurses | During go-live |
| **Connected nurses from high-performing sites to metro sites who need support/feedback** | Baptist | Develop stakeholder interrelationships | Barriers related to characteristics of the individuals implementing and supporting the intervention | Quarterly | 30 min | Study research staff | After go-live |
| **Team meeting when new colorectal surgery leader joined the team** | DHMC | Develop stakeholder interrelationships | Barriers in the inner setting | One time | 60 min | Physicians | After go-live |
| **Monthly leadership calls with co-investigators and clinic champions to review program progress** | DFCI | Develop stakeholder interrelationships | Barriers related to characteristics of the individuals implementing and supporting the intervention | Once monthly | 60 min | Study research staff | Before go-live |
| **Cross-site collaboration with Baptist regarding implementation strategies** | Maine | Develop stakeholder interrelationships | Barriers in the outer setting | One time | 60 min | Study research staff | After go-live |
| **Ongoing touch base with network leaders** | DFCI | Develop stakeholder interrelationships | Barriers in the inner setting | Once monthly | 30 min | Study research staff | Before go-live |
| **FAQ guide created from clinicians about the program** | DFCI | Train and educate stakeholders | Barriers related to characteristics of the individuals implementing and supporting the intervention | One time | 60 min | Study research staff | After go-live |
| **Nurses complete questionnaires with patients while in clinic in the event there are barriers to access at home** | Baptist | Engage consumers | Barriers related to process in the delivery setting | Select patient encounters | 15 min | Nurses | After go-live |
| **Encouraged proxy use during phone calls and scheduled follow-up calls to speak with proxies** | Dartmouth | Engage consumers | Barriers related to process in the delivery setting | Select patient encounters | 15 min | Study research staff | After go-live |
| **Offered zoom meetings to patients to review eSyM** | DFCI | Engage consumers | Barriers related to process in the delivery setting | Select patient encounters | 15 min | Study research staff | After go-live |
| **Initial creation of eSyM flyers and pamphlets for patients** | DFCI | Engage consumers | Barriers related to process in the delivery setting | One time | 10 hrs | Study research staff | Before go-live |
| **Tablets used to enroll patients and demo eSyM** | WVU | Engage consumers | Barriers related to process in the delivery setting | Select patient encounters | 20 min | Study research staff | After go-live |
| **Newsletter sent out to medical oncology and surgery clinics with program updates** | DFCI | Support clinicians | Barriers related to the characteristics of the individuals implementing and supporting the intervention | Once monthly | 2 hrs | Study research staff | After go-live |
| **Conducted patient raffle to encourage use of program** | DFCI | Utilize financial strategies | Barriers related to process in the delivery setting | Select patient encounters | 8 hrs | Study research staff | After go-live |

# **Supplemental Table 6. Description of Inactive Strategies**

| **Brief Strategy Description** | **Site** | **ERIC Classification** | **CFIR Barrier Addressed** | **Reason for Inactivation** |
| --- | --- | --- | --- | --- |
| **Virtual refresher training provided to a clinic champion** | Baptist | Train and educate stakeholders | Barriers related to the characteristics of the individuals implementing and supporting the intervention | Planned stoppage |
| **Moonshot meetings with clinical, operational, technical, marketing leaders, oncologists and hospital staff** | Baptist | Use evaluative and iterative strategies | Barriers related to process in the delivery setting | Resource intensive |
| **On-site education provided to metro clinics** | Baptist | Train and educate stakeholders | Barriers related to process in the delivery setting | Planned stoppage |
| **Monthly calls with program champions** | Baptist | Use evaluative and iterative strategies | Barriers related to process in the delivery setting | Resource intensive |
| **Use of iPads in clinic for patients to complete questionnaires** | Baptist | Change infrastructure | Barriers related to process in the delivery setting | Ineffective |
| **Updated marketing materials** | Baptist | Engage consumers | Barriers related to process in the delivery setting | Planned stoppage |
| **Project manager shadowed eSyM processes at clinic site to identify areas of opportunity** | Baptist | Use evaluative and iterative strategies | Barriers related to process in the delivery setting | Planned stoppage |
| **Made eSyM videos more accessible by uploading to Youtube and sharing them via email** | Baptist | Train and educate stakeholders | Barriers related to characteristics of the intervention | Planned stoppage |
| **Drafted eSyM workflow overview (used to train new hires)** | Baptist | Use evaluative and iterative strategies | Barriers in the inner setting | Planned stoppage |
| **On-site education provided to GYN group** | Baptist | Train and educate stakeholders | Barriers related to the characteristics of the individuals implementing and supporting the intervention | Planned stoppage |
| **eSyM video presented to the thoracic team to gain buy-in from clinicians** | Baptist | Train and educate stakeholders | Barriers related to characteristics of the intervention | Planned stoppage |
| **Project manager on site to support eSyM and encourage patient use** | Baptist | Engage consumers | Barriers in the inner setting | Too time intensive |
| **Changed scripting to educational approach and called patients once monthly rather than every 2 weeks, soon reverted back to regular workflow** | Baptist | Use evaluative and iterative strategies | Barriers related to process in the delivery setting | Ineffective |
| **15-20 medical oncology patients and caregivers gave feedback on the program** | Baptist | Use evaluative and iterative strategies | Barriers related to process in the delivery setting | Planned stoppage |
| **Manual KPI reporting** | Baptist | Use evaluative and iterative strategies | Barriers related to process in the delivery setting | Planned stoppage |
| **“Over-the-shoulder” training with medical oncology clinic champions** | Baptist | Train and educate stakeholders | Barriers related to the characteristics of the individuals implementing and supporting the intervention | Planned stoppage |
| **Manual KPI reporting** | Dartmouth | Use evaluative and iterative strategies | Barriers related to process in the delivery setting | Planned stoppage |
| **Training PM and core champions and then PM training care teams** | Dartmouth | Train and educate stakeholders | Barriers related to the characteristics of the individuals implementing and supporting the intervention | Planned stoppage |
| **Conducting training with groups of oncologists, advanced practice providers, nurses, IT personnel around time of surgical and medical oncology go-live** | Dartmouth | Train and educate stakeholders | Barriers related to the characteristics of the individuals implementing and supporting the intervention | Planned stoppage |
| **Meet one-on-one with med onc advanced practice providers to educate them about study to facilitate their introducing patients to eSyM during chemo teaching; provide patient teaching points to APPs and flyers to distribute to patients.** | Dartmouth | Train and educate stakeholders | Barriers related to the characteristics of the individuals implementing and supporting the intervention | Planned stoppage |
| **Attended patient advocacy meetings, gave overview of project and gained support; obtained feedback on patient video and other materials** | Dartmouth | Develop stakeholder interrelationships | Barriers related to characteristics of the intervention | Planned stoppage |
| **Team meeting when new colorectal surgery leader joined the team** | Dartmouth | Develop stakeholder interrelationships | Barriers in the inner setting | Planned stoppage |
| **“Over-the-shoulder” training with medical oncology clinic champions** | Dartmouth | Train and educate stakeholders | Barriers related to the characteristics of the individuals implementing and supporting the intervention | Planned stoppage |
| **Distributed educational materials to providers** | Dartmouth | Train and educate stakeholders | Barriers related to the characteristics of the individuals implementing and supporting the intervention | Planned stoppage |
| **Validating reports and KPI data** | Dartmouth | Use evaluative and iterative strategies | Barriers related to characteristics of the intervention | Planned stoppage |
| **Leverage the Research Coordinator to review reports and provide feedback to the department. Kim provides training to Susan, and she in turn trains the nurse staff.** | Maine | Train and educate stakeholders | Barriers related to characteristics of the intervention | Planned stoppage |
| **Marketing team developed feature on eSyM for the annual report** | Maine | Develop stakeholder interrelationships | Barriers related to the characteristics of the individuals implementing and supporting the intervention | Planned stoppage |
| **Pre-go-live training sessions for med onc groups** | Maine | Train and educate stakeholders | Barriers related to the characteristics of the individuals implementing and supporting the intervention | Planned stoppage |
| **Reviewed registry for eligible patients at study start and validated all RWB reports** | Maine | Use evaluative and iterative strategies | Barriers related to characteristics of the intervention | Planned stoppage |
| **Went to team meetings/morning huddles to encourage eSyM use amongst clinicians** | Maine | Develop stakeholder interrelationships | Barriers related to the characteristics of the individuals implementing and supporting the intervention | Planned stoppage |
| **MMC team shadowed DFCI team during site visit using esym** | Maine | Train and educate stakeholders | Barriers related to process in the delivery setting | Planned stoppage |
| **Visited all surg onc clinics (separate locations)** | Maine | Train and educate stakeholders | Barriers related to process in the delivery setting | Planned stoppage |
| **Manual KPI reporting** | Maine | Use evaluative and iterative strategies | Barriers related to process in the delivery setting | Planned stoppage |
| **Distributed educational materials to providers and nurses** | Maine | Train and educate stakeholders | Barriers related to process in the delivery setting | Planned stoppage |
| **Approach pts in-person post surgery, before discharge to provide education** | WVU | Engage consumers | Barriers related to process in the delivery setting | Time intensive |
| **Approach pts in person at pre-admission appt** | WVU | Engage consumers | Barriers related to process in the delivery setting | Time intensive |
| **Develop marketing materials** | WVU | Engage consumers | Barriers related to process in the delivery setting | Planned stoppage |
| **Asked Floor RNs to hand out eSyM patient flyer when going over discharge instructions** | WVU | Engage consumers | Barriers related to process in the delivery setting | Time intensive |
| **Use of tablets to enroll patients/demo eSyM** | WVU | Engage consumers | Barriers related to process in the delivery setting | Time intensive |
| **Manual KPI reporting** | WVU | Use evaluative and iterative strategies | Barriers related to process in the delivery setting | Planned stoppage |
| **Manual KPI reporting** | Lifespan | Use evaluative and iterative strategies | Barriers related to process in the delivery setting | Planned stoppage |
| **Training NP who then went back to train rest of her team on esym after we trained her** | Lifespan | Train and educate stakeholders | Barriers related to process in the delivery setting | Planned stoppage |
| **Pre-go-live site meetings with clinic teams** | Lifespan | Use evaluative and iterative strategies | Barriers related to the characteristics of the individuals implementing and supporting the intervention | Planned stoppage |
| **Made clinician FAQ page available** | Lifespan | Train and educate stakeholders | Barriers related to the characteristics of the individuals implementing and supporting the intervention | Planned stoppage |
| **LCI leadership accepted eSyM as a Quality Metric** | Lifespan | Develop stakeholder interrelationship | Barriers in the inner setting | Planned stoppage |
| **Manual KPI reporting** | DFCI | Use evaluative and iterative strategies | Barriers related to process in the delivery setting | Time intensive |
| **1:1 educational meetings with ONNs** | DFCI | Train and educate stakeholders | Barriers related to the characteristics of the individuals implementing and supporting the intervention | Planned stoppage |
| **FAQs page developed** | DFCI | Train and educate stakeholders | Barriers related to the characteristics of the individuals implementing and supporting the intervention | Planned stoppage |
| **Patients who were anticipated to start a new treatment received outreach to set up a 15- minute call to discuss eSyM. The goal was to educate patients on the program becoming available to them after their D1C1 date.** | DFCI | Engage consumers | Barriers related to process in the delivery setting | Resource intensive |
| **Update marketing/ communication materials** | DFCI | Engage consumers | Barriers related to process in the delivery setting | Planned stoppage |
| **Emailing patients eligible for eSyM with an upcoming appointment to clinicians** | DFCI | Support Clinicians | Barriers related to the characteristics of the individuals implementing and supporting the intervention | Clinicians or leadership didn’t like it |
| **Initial creation of eSyM flyers and pamphlets for patients** | DFCI | Engage consumers | Barriers related to process in the delivery setting | Planned stoppage |
| **Conducted patient raffle to encourage use of program** | DFCI | Utilize financial strategy | Barriers related to process in the delivery setting | Ineffective |
| **Offered zoom meetings to patients to review eSyM** | DFCI | Engage consumers | Barriers related to process in the delivery setting | Ineffective |
| **Rebranding of eSyM flyers and emails** | DFCI | Engage consumers | Barriers related to process in the delivery setting | Planned stoppage |
| **Moderate symptom pilot in GYN clinic, nursing staff called patients with moderate symptoms** | DFCI | Use evaluative and iterative strategies | Barriers related to the characteristics of the individuals implementing and supporting the intervention | Time intensive |
| **Sending daily opportunity reports to clinicians to remind them of patients with an upcoming appointment who have eSyM assigned** | DFCI | Support Clinicians | Barriers related to the characteristics of the individuals implementing and supporting the intervention | Clinicians or leadership didn’t like it |
| **Preparatory meetings with Brigham thoracic teams, shifted focus to Mass General thoracic teams** | DFCI | Use evaluative and iterative strategies | Barriers in the inner setting | Planned stoppage |
| **Pre-go-live site meetings with clinic teams** | DFCI | Use evaluative and iterative strategies | Barriers related to the characteristics of the individuals implementing and supporting the intervention | Planned stoppage |
| **Validating reports and KPI data** | DFCI | Use evaluative and iterative strategies | Barriers related to characteristics of the intervention | Planned stoppage |
| **“Over-the-shoulder” training with medical oncology clinic champions** | DFCI | Train and educate stakeholders | Barriers related to the characteristics of the individuals implementing and supporting the intervention | Planned stoppage |
| **Overall wellbeing alerting turned off, physical function alerting threshold changed** | SIMPRO | Use evaluative and iterative strategies | Barriers related to characteristics of the intervention | Planned stoppage |
| **Questionnaire lookback period changed from 7 days to 24 hours** | SIMPRO | Use evaluative and iterative strategies | Barriers related to characteristics of the intervention | Planned stoppage |
| **Creation of new emojis for pictogram questions** | SIMPRO | Use evaluative and iterative strategies | Barriers related to characteristics of the intervention | Planned stoppage |
| **Pre go-live clicker questions and informal focus groups** | SIMPRO | Use evaluative and iterative strategies | Barriers related to the characteristics of the individuals implementing and supporting the intervention | Planned stoppage |
| **Created 14 sqls for sites to extract eSyM data from the EHR** | SIMPRO | Adapt and tailor to the context | Barriers related to process in the delivery setting | Planned stoppage |
| **Created SIMPRO flyers, pamphlets, tip sheets, videos and templates for SIMPRO sites to use** | SIMPRO | Train and educate stakeholders | Barriers related to process in the delivery setting | Planned stoppage |
| **Pilot testing of the eSyM questionnaire prior to go-live** | SIMPRO | Engage consumers | Barriers related to characteristics of the intervention | Planned stoppage |
| **Substantial change to program homepage in the EHR portal** | SIMPRO | Change infrastructure | Barriers related to characteristics of the intervention | Planned stoppage |
| **Epic training technical support to support eSyM** | SIMPRO | Provide interactive assistance | Barriers related to the characteristics of the individuals implementing and supporting the intervention | Planned stoppage |
| **Deciding which data metrics to include in KPI reports across all sites** | SIMPRO | Use evaluative and iterative strategies | Barriers related to process in the delivery setting | Planned stoppage |
